# Supplementary material for: Model-Based Economic Evaluations of Interventions for Dementia: An Updated Systematic Review and Quality Assessment
Source: Springer Nature journal article supplement (doi:10.1007/s40258-024-00878-0), 2024-03-30
Supplement: MOESM2 [file 26925370]

## Sheet: identity
Applied Health Economics and Health Policy
A systematic review update and quality assessment of model-based economic evaluations of interventions for dementia
Mohsen Ghaffari Darab*1,2, Lidia Engel3, Dennis Henzler 2, Michael Lauerer 2, Eckhard Nagel 2, Vicki Brown1#, Cathrine Mihalopoulos 3#
1- Deakin University, Geelong, Australia, Institute for Health Transformation, Deakin Health Economics, School of Health and Social Development.
2- Institute for Management in Medicine and Health Sciences, Bayreuth University, Bayreuth, Germany.
3- School of Public Health and Preventive Medicine, Monash University, Melbourne, Australia.
# Joint last authors
*Corresponding author: Mohsen Ghaffari Darab
E-mail: mghaffaridarab@deakin.edu.au
Competing Interests
The authors declared no conflict of interest.
Funding
M.GD is a recipient of Deakin University Postgraduate Research Scholarships (DUPR). The other authors have no funding sources associated with this study to declare.

## Sheet: Philips
				1	2	3	4	5	6	7	8	9	10	11	12	13	14	15	16	17	18	19	20	21	22	23
				M Tullberg, 2018	T L Michaud, 2018	L R da Silva, 2019	J Mar, 2020	I Yunusa, 2021	P G Synnott, 2021	A Wimo, 2022	A A Tahami Monfared, 2022	J Contador, 2022	E L Ross, 2022	K Kongpakwattana, 2020	S Vandepitte, 2020	M M Mesquida, 2021	Y S Lee, 2021	M D Whittington, 2022	D Zala, 2017	C H Lin, 2019	Zehra Onen, 2019	S Baker, 2022	Alicia A. Christensen, 2022	M Knapp, 2022	I. McRae, 2021	N X Thanh, 2020	count Yes	percentage Yes
Structure (S)	S1: Statement of decision problem/ objective	1	Is there a clear statement of the decision problem?	Yes	Yes	Yes	Yes	Yes	No	Yes	Yes	Yes	Yes	Yes	Yes	Yes	Yes	Yes	No	Yes	Yes	Yes	Yes	No	No	Yes	19	0.826087
		2	Is the objective of the model specified and consistent with the stated decision problem?	Yes	Yes	Yes	Yes	Yes	Yes	Yes	Yes	Yes	Yes	Yes	Yes	Yes	Yes	Yes	Yes	Yes	Yes	Yes	Yes	No	No	Yes	21	0.913043
		3	Is the primary decision maker specified?	No	No	Yes	No	No	No	No	No	No	No	No	No	No	No	No	Yes	No	No	No	No	Yes	No	No	3	0.130435
	S2: Statement of scope/ perspective	1	Is the perspective of the model stated clearly?	Yes	Yes	Yes	Yes	Yes	Yes	Yes	Yes	Yes	Yes	Yes	Yes	Yes	Yes	Yes	Yes	Yes	Yes	Yes	Unclear	Unclear	Unclear	Yes	20	0.869565
		2	Are the model inputs consistent with the stated perspective?	Yes	Yes	Yes	Yes	Yes	Unclear	Yes	Yes	Yes	No	No	Yes	Yes	Unclear	No	Unclear	Yes	Unclear	Unclear	Unclear	Unclear	Unclear	Yes	12	0.521739
		3	Has the scope of the model been stated and justified?	Yes	Yes	Yes	Yes	Yes	No	Yes	Yes	Yes	Yes	No	Yes	Yes	Yes	Yes	No	No	Yes	No	Yes	Yes	Yes	Yes	18	0.782609
		4	Are the outcomes of the model consistent with the perspective, scope and overall objective of the model?	Yes	Yes	Yes	Yes	Yes	Yes	Yes	Yes	Yes	Yes	Yes	Yes	Yes	Yes	Yes	Yes	Yes	Yes	No	Yes	Unclear	Unclear	No	19	0.826087
	S3: Rationale for structure	1	Has the evidence regarding the model structure been described?	No	No	Yes	Yes	Yes	No	Yes	Yes	Yes	Yes	Yes	Yes	Yes	Yes	No	Yes	No	No	No	No	No	No	No	12	0.521739
		2	Is the structure of the model consistent with a coherent theory of the health condition under evaluation?	Unclear	Yes	Yes	Yes	Yes	No	Yes	Yes	No	Yes	Unclear	No	Yes	Yes	Yes	Yes	Yes	Yes	Unclear	Yes	Unclear	Unclear	No	14	0.608696
		3	Have any competing theories regarding model structure been considered?	No	No	No	No	No	No	No	Yes	No	No	No	No	No	No	No	No	No	No	No	No	Yes	Yes	No	3	0.130435
		4	Are the sources of the data used to develop the structure of the model specified?	No	Yes	Yes	Yes	No	No	Yes	Yes	No	No	Yes	No	No	Yes	No	Yes	No	No	No	No	No	No	No	8	0.347826
		5	Are the causal relationships described by the model structure justified appropriately?	No	Yes	No	No	No	No	Yes	Unclear	No	Yes	Yes	Yes	Yes	Yes	No	Yes	No	Yes	No	No	No	No	No	9	0.391304
	S4: Strucural assumptions	1	Are the structural assumptions transparent and justified?	No	Yes	No	Yes	No	No	Yes	No	No	Yes	Yes	Yes	Yes	Yes	No	No	No	No	No	No	No	No	No	8	0.347826
		2	Are the structural assumptions reasonable given the overall objective, perspective and scope of the model?	Unclear	Yes	Unclear	Yes	Unclear	No	Yes	Yes	Yes	Yes	No	Yes	Yes	Yes	Yes	Yes	Yes	Unclear	Unclear	Unclear	No	No	No	12	0.521739
	S5: Strategies/ comparators	1	Is there a clear definition of the options under evaluation?	Yes	Yes	Yes	Yes	Yes	No	No	Yes	Yes	Yes	Yes	Yes	No	Yes	Yes	No	No	No	No	No	Yes	No	No	13	0.565217
		2	Have all feasible and practical options been evaluated?	Unclear	Yes	Yes	Unclear	Yes	Unclear	Unclear	No	Unclear	No	No	Unclear	No	Unclear	No	Unclear	Unclear	Unclear	Unclear	Unclear	No	No	No	3	0.130435
		3	Is there justification for the exclusion of feasible options?	No	Yes	No	No	No	Unclear	No	No	No	No	No	No	No	No	No	No	No	No	No	No	No	No	No	1	0.0434783
	S6: Model type	1	Is the chosen model type appropriate given the decision problem and specified causal relationships within the model?	Yes	Yes	Yes	Yes	Yes	Unclear	Yes	Yes	Yes	Yes	Yes	Yes	Yes	Yes	Yes	Yes	Yes	Yes	Unclear	No	Yes	No	No	18	0.782609
	S7: Time horizon	1	Is the time horizon of the model sufficient to reflect all important differences between options?	Yes	Yes	No	Yes	Yes	Yes	Yes	Yes	Yes	Yes	No	No	No	Yes	Yes	No	Unclear	Yes	Yes	No	No	No	Yes	14	0.608696
		2	Is the time horizon of the model, and the duration of treatment and treatment effect described and justified?	No	Yes	Yes	Yes	Yes	Yes	Yes	Yes	Yes	No	No	Yes	No	Yes	Yes	Yes	Unclear	No	Yes	No	No	No	No	13	0.565217
		3	Has a lifetime horizon been used? If not, has a shorter time horizon been justified?	Yes	Yes	No	Yes	Yes	Yes	Yes	Yes	No	Yes	No	Yes	No	Yes	Yes	No	No	Yes	Yes	No	No	No	No	13	0.565217
	S8: Disease states/ pathways	1	Do the disease states (state transition model) or the pathways (decision tree model) reflect the underlying biological process of the disease in question and the impact of interventions?	Yes	Yes	Yes	Yes	Yes	Unclear	Yes	Yes	Yes	Yes	No	No	No	Yes	Yes	No	Yes	Yes	Unclear	No	No	No	No	13	0.565217
	S9: Cycle length	1	Is the cycle length defined and justified in terms of the natural history of disease?	No	Yes	Yes	Unclear	Unclear	Unclear	Yes	No	No	Yes	No	No	No	Yes	Yes	Yes	Unclear	No	No	N/A	N/A	No	N/A	7	0.35
Data (D)	D1: Data identification	1	Are the data identification methods transparent and appropriate given the objectives of the model?	No	Yes	No	No	No	No	Yes	No	No	No	No	No	No	No	No	Yes	No	No	No	No	No	No	No	3	0.130435
		2	Where choices have been made between data sources, are these justified appropriately?	Unclear	No	Unclear	No	No	No	Yes	Unclear	No	No	Unclear	No	No	Unclear	No	No	No	No	No	No	No	No	No	1	0.0434783
		3	Has particular attention been paid to identifying data for the important parameters in the model?	No	No	No	No	No	No	Yes	Unclear	No	No	Yes	No	No	Yes	No	No	No	No	No	No	No	No	No	3	0.130435
		4	Has the process of selecting key parameters been justified and systematic methods used to identify the most appropriate data?	No	No	No	No	No	No	Yes	No	No	No	Yes	No	No	Yes	No	No	No	No	No	No	No	No	No	3	0.130435
		5	Has the quality of the data been assessed appropriately?	No	Unclear	No	No	No	No	Unclear	No	No	No	No	Unclear	No	Unclear	Unclear	No	No	No	No	No	No	No	No	0	0
		6	Where expert opinion has been used, are the methods described and justified?	N/A	Yes	N/A	N/A	N/A	No	N/A	No	N/A	N/A	N/A	N/A	No	Yes	No	N/A	N/A	N/A	N/A	N/A	N/A	N/A	N/A	2	0.333333
	D2: Pre-model data analysis	1	Are the pre-model data analysis methodology based on justifiable statistical and epidemiological techniques?	No	No	No	No	No	No	Yes	No	No	No	Yes	No	No	No	Unclear	No	No	Unclear	No	No	No	No	No	2	0.0869565
	D2a: baseline data	1	Is the choice of baseline data described and justified?	No	Yes	Unclear	No	No	No	Yes	No	No	Yes	No	Yes	Yes	No	Yes	Yes	No	No	No	No	No	No	No	7	0.304348
		2	Are transition probabilities calculated appropriately?	Yes	Yes	Unclear	Unclear	Yes	No	Yes	Unclear	Unclear	Unclear	Unclear	Unclear	Yes	Unclear	Unclear	No	Yes	Yes	No	No	Unclear	Unclear	No	7	0.304348
		3	Has a half cycle correction been applied to both cost and outcome?	No	No	No	Unclear	No	Unclear	Yes	No	No	No	No	No	No	Yes	No	No	No	No	No	No	No	No	No	2	0.0869565
		4	If not, has this omission been justified?	No	No	No	No	No	No	N/A	No	No	No	No	No	No	N/A	No	No	No	No	No	Unclear	No	No	No	0	0
	D2b: treatment effects	1	If relative treatment effects have been derived from trial data, have they been synthesised using appropriate techniques?	Yes	Yes	Unclear	No	Yes	Unclear	Yes	No	No	Yes	Yes	Unclear	No	Unclear	Unclear	No	Unclear	Unclear	No	No	No	No	No	6	0.26087
		2	Have the methods and assumptions used to extrapolate short-term results to final outcomes been documented and justified? Have alternative assumptions been explored through sensitivity analysis?	No	Unclear	Yes	No	No	No	Yes	No	N/A	Unclear	Yes	Unclear	No	Unclear	Unclear	Yes	Yes	No	Unclear	No	Unclear	No	No	5	0.217391
		3	Have assumptions regarding the continuing effect of treatment once treatment is complete been documented and justified? Have alternative assumptions been explored through sensitivity analysis?	No	Yes	No	No	No	No	Yes	No	N/A	Unclear	Yes	No	No	No	No	No	No	Yes	No	No	Unclear	No	No	4	0.173913
	D2c: quality-of-life weights (utilities)	1	Are the utilities incorporated into the model appropriate?	Yes	Yes	Yes	Yes	Unclear	No	Yes	Yes	N/A	Yes	Yes	Yes	No	Yes	Yes	Yes	Yes	Yes	Unclear	Unclear	Yes	Unclear	N/A	15	0.652174
		2	Is the source for the utility weights referenced?	Yes	Yes	Yes	Yes	No	No	Yes	Yes	N/A	Yes	Yes	Yes	No	Yes	Yes	Yes	Yes	Yes	N/A	No	Yes	Unclear	N/A	15	0.652174
		3	Are the methods of derivation for the utility weights justified?	Yes	Yes	No	No	No	No	Yes	Yes	N/A	Unclear	Yes	No	Unclear	Yes	Unclear	Yes	No	No	N/A	No	Yes	Unclear	N/A	8	0.347826
	D3: Data incorporation	1	Have all data incorporated into the model been described and referenced in sufficient detail?	Yes	Yes	Yes	Yes	No	No	Yes	Yes	Yes	Yes	Yes	Yes	No	Yes	No	Yes	No	No	No	No	No	No	No	12	0.521739
		2	Has the use of mutually inconsistent data been justified (i.e. are assumptions and choices appropriate)?	No	Yes	No	No	No	No	Yes	No	No	Unclear	Yes	No	No	Unclear	No	No	No	No	No	No	No	No	No	3	0.130435
		3	Is the process of data incorporation transparent?	No	Yes	No	No	No	No	Yes	Yes	No	No	Yes	No	No	Yes	No	Yes	No	No	No	No	No	No	No	6	0.26087
		4	If data have been incorporated as distributions, has the choice of distribution for each parameter been described and justified?	Yes	Yes	Yes	Yes	Yes	Unclear	Yes	No	No	Yes	No	Yes	Unclear	No	Yes	Yes	Yes	Unclear	Unclear	Unclear	Unclear	No	Yes	12	0.521739
		5	If data have been incorporated as distributions, is it clear that second order uncertainty is reflected?	Yes	Yes	Yes	Yes	Yes	Unclear	Yes	Yes	Yes	Yes	Yes	Yes	No	Yes	Yes	Yes	Yes	Yes	Yes	Yes	Yes	Yes	Yes	21	0.913043
	D4: Assessment of uncertainty	1	Have the four principal types of uncertainty been addressed?	No	Yes	No	No	No	No	Yes	No	No	No	No	No	No	No	No	No	No	No	No	No	No	No	No	2	0.0869565
		2	If not, has the omission of particular forms of uncertainty been justified?	No	Yes	No	No	No	No	Yes	No	No	No	No	No	No	No	No	No	No	No	No	No	No	No	No	2	0.0869565
	D4a: methodological	1	Have methodological uncertainties been addressed by running alternative versions of the model with different methodological assumptions?	No	Yes	Unclear	No	No	No	Yes	No	No	No	No	No	No	No	Yes	No	No	No	No	No	No	No	No	3	0.130435
	D4b: structural	1	Is there evidence that structural uncertainties have been addressed via sensitivity analysis?	No	Yes	No	Yes	Yes	No	Yes	Yes	No	Yes	No	Yes	No	No	Yes	Yes	Yes	No	Yes	No	No	No	No	11	0.478261
	D4c: heterogeneity	1	Has heterogeneity been dealt with by running the model separately for different sub-groups?	No	Yes	No	No	Yes	No	Yes	No	No	No	No	No	No	No	No	No	Yes	No	No	No	No	No	No	4	0.173913
	D4d: parameter	1	Are the methods of assessment of parameter uncertainty appropriate?	Unclear	Yes	Unclear	Yes	Yes	No	Yes	Yes	Yes	Yes	Yes	Yes	No	No	Yes	Yes	Yes	Unclear	Unclear	Yes	Yes	No	Yes	15	0.652174
		2	Has probabilistic sensitivity analysis been done, if not has this been justified?	No	Yes	Yes	No	Yes	No	Yes	Yes	Yes	Yes	Yes	Yes	No	No	Yes	Yes	Yes	No	No	Yes	Yes	No	Yes	15	0.652174
		3	If data are incorporated as point estimates, are the ranges used for sensitivity analysis stated clearly and justified?	Yes	Yes	No	Yes	Yes	No	Yes	No	Yes	Yes	Yes	No	No	No	Yes	Yes	Yes	No	No	Yes	No	No	No	12	0.521739
Consistency (C)	C1: Internal consistency	1	Is there evidence that the mathematical logic of the model has been tested thoroughly before use?	No	No	No	No	No	No	Yes	Yes	No	No	No	Yes	No	No	No	No	No	No	No	No	No	No	No	3	0.130435
	C2: External consistency	1	Are the conclusions valid given the data presented?	Yes	Yes	Yes	Yes	Yes	Yes	Yes	Yes	Yes	Unclear	Yes	Yes	Unclear	Yes	Yes	Yes	Unclear	Unclear	Unclear	Yes	Yes	No	Unclear	16	0.695652
		2	Are any counterintuitive results from the model explained and justified?	Unclear	No	Unclear	No	No	No	Yes	No	No	No	Unclear	No	Unclear	No	No	No	No	No	No	No	No	No	Yes	2	0.0869565
		3	If the model has been calibrated against independent data, have any differences been explained and justified?	Unclear	Unclear	Unclear	No	Yes	Yes	Yes	Yes	Unclear	Unclear	Unclear	No	Unclear	Unclear	No	No	No	No	No	No	No	No	Unclear	4	0.173913
		4	Have the results of the model been compared with those of previous models and any differences in results explained?	No	No	No	No	No	No	Yes	no	No	No	No	No	No	Not applicable	No	No	No	No	No	No	No	No	Yes	2	0.0869565
																											index	0
																											index	1

## Sheet: CHEERS
CHEERS 2022
			1	2	3	4	5	6	7	8	9	10	11	12	13	14	15	16	17	18	19	20	21	22	23
			Mats Tullberg, 2018	Tzeyu L. Michaud, 2018	Luciana R. da Silva, 2019	Javier Mar, 2020	Ismaeel Yunusa, 2021	Patricia G Synnott, 2021	Anders Wimo, 2022	Amir Abbas Tahami Monfared, 2022	Jose Contador, 2022	Eric L. Ross, 2022	Khachen Kongpakwattana, 2020	Sophie Vandepitte, 2020	Mireia Massot Mesquida, 2021	Young Sil Lee, 2021	Melanie D. Whittington, 2022	Darshan Zala, 2017	Chung-Hsien Lin, 2019	Zehra Onen, 2019	Stevenson Baker, 2022	Alicia A. Christensen, 2022	M Knapp, 2022	I. McRae, 2021	N X Thanh, 2020	count Yes	percentage Yes
Title	1	Title	Yes	Yes	Yes	Yes	Yes	Partially	Yes	Partially	Partially	Yes	Yes	Yes	Yes	Yes	Yes	Yes	Yes	No	Yes	Yes	No	Yes	No	17	0.73913
		Identify the study as an economic evaluation and specify the interventions being compared.	Title, Page 509 The control group was not specified.	Title, Page 309 The control group was not specified.	Title, Page 218 The interventions were not specified.	Title, Page 1 The interventions were not specified.	Title, Page 705	Title, Page 1613 The interventions were not specified. The title dose not reflect that it is an economic evaluation study.	Title, Page 1 The control group was not specified.	Title, Page 1285 The interventions were not specified. The title dose not reflect that it is an economic evaluation study.	Title, Page 1 The interventions were not specified. The title dose not reflect that it is an economic evaluation study.	Title, Page 478 The interventions were not specified.	Title, Page 710 The interventions were not specified.	Title, Page 601 The interventions were not specified.	Title, Page 1 The interventions were not specified.	Title, Page 1 The control group was not specified.	Title, Page e968 The control group was not specified.	Title, Page 308 The control group was not specified.	Title, Page 495 The control group was not specified.	Title, Page 14 The title of the study does not accurately represent the study as an economic evaluation, nor did it specify the interventions being compared.	Title, Page 531 The interventions were not specified.	Title, Page 56		Title, Page 210 The interventions were not specified.	Title, Page 11
Abstract	2	Abstract	Yes	Yes	Yes	Yes	Yes	No	Yes	Yes	Yes	Yes	Yes	Yes	Yes	Yes	Yes	Yes	Yes	Yes	Yes	Yes	Yes	Yes	Yes	22	0.956522
		Provide a structured summary that highlights context, key methods, results, and alternative analyses.	Abstract, Page 509	Abstract, Page 309	Abstract, Page 218	Abstract, Page 1	Abstract, Page 705	Executive Summary was provided in supplimentary file: full report. It does not have the qualities of an abstract, however.	Abstract, Page 2	Abstract, Page 1285	Abstract, Page 1	Abstract, Page 478	Abstract, Page 710	Abstract, Page 601	Abstract, Page 2	Abstract, Page 2	Abstract, Page e968	Abstract, Page 307	Abstract, Page 495	Abstract, Page 14	Abstract, Page 531	Abstract, Page 56	Abstract, Page 1	Abstract, Page 210	Abstract, Page 101
Introduction	3	Background and objectives	Yes	Yes	Yes	Yes	Yes	No	Yes	Yes	Yes	Yes	Yes	Yes	Yes	Yes	Yes	Yes	Yes	Partially	Yes	Yes	partially	Partially	Yes	19	0.826087
		Give the context for the study, the study question, and its practical relevance for decision making in policy or practice.	Introduction, Pages 509 and 510	Introduction, Pages 310	Introduction, Page 218	Introduction, Page 2	Introduction, Page 706	Final report, 1. Background, page 1-3 The study question, and its practical relevance for decision making in policy or practice regarding the cost-effectiveness study objectives are not clear enough.	Introduction, Page 2	Introduction, Page 1287	Introduction, Page 2	Introduction, Page 479	Introduction, Page 711	Introduction, Pages 601 and 602	Background, Page 2	Background, Page 2	Page e968	Introduction, Pages 307 and 308	Introduction, Page 496	Introduction, Page 15 The authors did not provide sufficient context for the study or clearly articulate the study question. Additionally, the practical relevance for decision making in policy or practice was not adequately addressed.	Page 532	Introduction, Page 57	Introduction, Page 2	Introduction, Page 210 The authors did not provide sufficient context for the study or clearly articulate the study question. Additionally, the practical relevance for decision making in policy or practice was not adequately addressed.	Introduction, Pages 101 and 102
Methods	4	Health economic analysis plan	No	No	No	No	No	No	No	No	No	No	No	No	Yes	No	No	No	No	No	No	No	No	No	No	1	0.0434783
		Indicate whether a health economic analysis plan was developed and where available.													Background, Page 2
	5	Study population	Yes	Yes	Yes	Yes	Yes	Yes	Yes	Yes	Yes	Yes	Yes	No	Yes	Yes	Partially	Yes	Yes	No	No	Partially	Partially	No	Yes	16	0.695652
		Describe characteristics of the study population (such as age range, demographics, socioeconomic, or clinical characteristics).	Methods, Patients, Page 510	Methods, Page 310	Methods, Page 219 The population characteristics in terms of demographics, socioeconomic and clinical characteristics were not described well enough.	Methods, Page 4	Methods, Page 706 The population characteristics in terms of demographics, and socioeconomic were not described well enough.	Page 1613 The population characteristics in terms of demographics, and socioeconomic were not described well enough.	Additional intervention program intervals, Page 5. The population characteristics in terms of demographics, and socioeconomic were not described well enough.	Introduction, Pages 1286 and 1289	Introduction, Page 1	Introduction, Page 480 The population characteristics in terms of demographics, and socioeconomic were not described well enough.	Introduction, Page 711 The population characteristics in terms of demographics, and socioeconomic were not described well enough.	The information regarding the population characteristics was not specified.	Methods, Intervention analyzed, Page 2 The population characteristics in terms of demographics, socioeconomic and clinical characteristics were not described well enough.	Target population, Page 2 The population characteristics in terms of demographics, socioeconomic and clinical characteristics were not described well enough.	The information regarding the population characteristics was not specified.	Population and treatments, Page 308 The information regarding the population characteristics was not specified.	Materials and methods, Page 496 The population characteristics in terms of demographics, and socioeconomic were not described well enough.	The information regarding the population characteristics was not specified.	some informatoin about the patients that typically use these programmes. "ages 60 to 79, university-educated,…" (p.3). The information regarding the population characteristics was not specified.	Materials and methods, Page 57 The information regarding the population characteristics was not specified.	Target population, Page 3 The information regarding the population characteristics was not specified.		Results, Page 104
	6	Setting and location	Yes	Yes	Partially	Partially	Yes	Yes	Yes	Yes	Yes	Partially	Partially	Yes	Yes	Partially	Partially	Partially	Partially	No	Yes	No	Yes	Partially	Yes	12	0.521739
		Provide relevant contextual information that may influence findings.	Methods, Costs, Page 511	Methods, Costs, Page 315	study location: Methods, Page 220 The study setting was not specified.	The study setting was not specified.	Particular setting of healthcare is adressed in the limitations section. The study setting was not clear.	Final report, D1. Detailed Methods Page 71	Introduction, Page 2	Introduction, Pages 1286 and 1287	Methods, Page 2	The study setting was not specified.	The study setting was not specified.	Introduction, Page 602	Introduction, Page 2	The study setting was not specified.	The study setting was not specified.	The study setting was not specified.	The study setting was not specified.		Page 532			The study setting was not specified.	Introduction, Page 102 and 104
	7	Comparators	Partially	Partially	Yes	Partially	Yes	Partially	Partially	Yes	Yes	Yes	Partially	Yes	No	Yes	Yes	Yes	No	Yes	No	Yes	Yes	Yes	Yes	14	0.608696
		Describe the interventions or strategies being compared and why chosen.	Methods, Page 511 The reason for choosing the control group was not described sufficiaently.	Methods, treatment strategies, Page 311 The reason for choosing the control group was not described sufficiently.	Introduction, Page 219	Intervention, Page 3 The reason for choosing these intervention to study was not justified.	Introduction and Methods Page 706	Economic Evaluation, Page 1614 Final report, executive summary, Page ES1 The reason for choosing these intervention to study was not justified.	Table 1, Page 5	Introduction, Page 1286	Introduction, Page 1 Figure 1 in Methods	Introduction, Page 479	Intervention, Page 3 The reason for choosing these intervention to study was not justified.	Introduction, Pages 601 and 602		Introduction, Page 2	Introduction, Page e969	Populations and treatments, Page 308	The compared interventions or strategies are not clear and specified.	The Model, Page 15		Materials and methods, Page 57	Intervention, Page 3	Example 1 – Estimates of Dementia Prevention using Population Attributable Risk Example 2 – BBL-GP Intervention Page 4	Introduction, Page 102
	8	Perspective	Yes	Yes	Yes	Yes	Yes	Yes	Yes	Yes	Yes	Yes	Yes	Yes	Yes	Yes	Yes	Yes	Yes	Yes	Yes	Yes	No	Yes	Yes	22	0.956522
		State the perspective(s) adopted by the study and why chosen.	Methods, Page 510, 511, and 512 The reason for choosing the study perspective was not described.	Methods, Costs, Page 314 The reason for choosing the study perspective was not described.	Methods, Page 220	Methods, Page2	Methods, Page 707 The reason for choosing the study perspective was not clear. On p. 707, the data was obtained from the NACC, suggesting that the outcome might have been prespecified, although it is not described in great detail.	Economic Evaluation, Page 1614 The reason for choosing the study perspective was not clear.	Methods, Page 4 The reason for choosing the study perspective was not clear.	Introduction, Page 1286 It did not describe the reason for choosing the study perspectives.	Introduction, Page 3 It did not describe the reason for choosing the study perspectives.	Introduction, Page 483 It did not describe the reason for choosing the study perspectives.	Methods, Overall description, Page 711	Introduction, Page 602 It did not describe the reason for choosing the study perspectives.	Cost and utility values, Page 4 It did not describe the reason for choosing the study perspectives.	Cost, Page 5 It did not describe the reason for choosing the study perspectives.	Introduction, Page e969 It did not describe the reason for choosing the study perspectives.	Methods, Page 308	Materials and methods, Page 496 It did not describe the reason for choosing the study perspectives.	The model , Page 16 It did not describe the reason for choosing the study perspectives.	Page 532 It did not describe the reason for choosing the study perspectives.	Materials and methods, Page 59 It did not describe the reason for choosing the study perspectives.		Abstract It did not describe the reason for choosing the study perspectives.	Methods, Page 102 It did not describe the reason for choosing the study perspectives.
	9	Time horizon	Partially	Partially	Partially	Partially	Yes	Partially	Partially	Yes	Yes	Partially	Yes	Yes	Partially	Partially	Partially	Partially	No	Partially	Yes	No	No	No	Partially	6	0.26087
		State the time horizon for the study and why appropriate.	Abstract, Page 509 The reason for appropriateness of chosen time horizon was not justified.	Methods, Page 310	Methods, Page 219 The reason for appropriateness of chosen time horizon was not justified.	Methods, Page 2 The reason for appropriateness of chosen time horizon was not justified.	Discussion, Page 707 On p. 707 a justification for lifetime horizon is provided: "(ie, the patient's lifetime which was until every patient dies, and consistent with studies that have indicated that people over 65 can live between 4 to 20 years)."	Economic Evaluation, Page 1614 The reason for appropriateness of chosen time horizon was not justified.	Methods, Basic model design, Page 2 The reason for appropriateness of chosen time horizon was not justified.	Methods, Page 1287	Model description, Page 3	Methods, Overview, Page 479 The reason for appropriateness of chosen time horizon was not justified.	Methods, Overall description, Page 711	Introduction, Page 602	Cost and utility values, Page 4 The reason for appropriateness of chosen time horizon was not justified.	Analysis, Page 4 The reason for appropriateness of chosen time horizon was not justified.	Methods, Study design, Page e969 The reason for appropriateness of chosen time horizon was not justified.	Methods, Page 308 The reason for appropriateness of chosen time horizon was not justified.		A numerical implementation of the model, Page 17	Benefits: Potential Savings Pathways, Page 533				Methods, Page 102 It did not describe the reason for choosing the time horizon.
	10	Discount rate	Partially	Yes	Partially	Partially	Yes	Partially	Partially	Yes	Yes	Partially	Yes	Yes	No	Yes	Partially	Partially	Partially	No	No	Partially	No	Yes	No	8	0.347826
		Report the discount rate(s) and reason chosen.	Methods, Pages 510, 511, and 512 The reason for choosing the incorporated discount rate was not described.	Methods, Page 310	Methods, Pages 220 The reason for choosing the incorporated discount rate was not described.	Methods, Pages 2 The reason for choosing the incorporated discount rate was not described.	Methods, Model outcomes and analysis Page 707	Economic Evaluation, Page 1614 The reason for choosing the incorporated discount rate was not described.	Methods, Basic model design, Page 2 The reason for choosing the incorporated discount rate was not described.	Methods, Page 1287	Model description, Page 3	Methods, Overview, Page 479 The reason for choosing the incorporated discount rate was not described.	Methods, Overall description, Page 711	Methods, Model design, Page 602		Analysis, Page 4	Methods, Study design, Page e969 The reason for choosing the incorporated discount rate was not described.	Methods, Page 308 The reason for choosing the incorporated discount rate was not described.	Materials and methods, Page 496 The reason for choosing the incorporated discount rate was not described.			Materials and methods, Page 57 The reason for choosing the incorporated discount rate was not described.		Discounting, Page 212
	11	Selection of outcomes	Partially	Yes	Partially	Partially	Partially	Partially	Partially	Yes	Yes	Yes	Yes	Yes	Yes	Yes	Partially	Yes	Yes	Yes	No	Yes	Yes	Partially	Yes	14	0.608696
		Describe what outcomes were used as the measure(s) of benefit(s) and harm(s).	Methods, Page 510 The rational for choosing the outcomes was not described clearly.	Methods, Page 310	Methods, Page 219 The rational for choosing the outcomes was not described clearly.	Methods, Page 219 The rational for choosing the outcomes was not described clearly.	Methods, Model parameters, Page 707 The rational for choosing the outcomes was not described clearly.	Table 1, Page 1614 The rational for choosing the outcomes was not described.	2.3.5 QALYs, Page 4 The rational for choosing the outcomes was not described.	Treatment Effect and Dosing, Page 1291	Model outcomes and clinical effectiveness, Page 2	Methods, Overview, Page 479	Model Parameters and Data Sources, Page 711	Method, Clinical data input, Page 604	Methods, Model description, Page 3	Analysis, Page 4	Methods, Page e969 The rational for choosing the outcomes was not described.	Methods, page 309	Materials and methods, Page 496	Quality of life data, Page 18		Materials and methods, Page 58	Outcomes, Page 3		Methods, Page 102
	12	Measurement of outcomes	Yes	Yes	Yes	Yes	Yes	Partially	Yes	Yes	Yes	Yes	Yes	Yes	Yes	Yes	No	Yes	Yes	Yes	No	Yes	Yes	No	Yes	19	0.826087
		Describe how outcomes used to capture benefit(s) and harm(s) were measured.	Methods, Page 510	Methods, Treatment Effectiveness, Pages 313, and 314	Methods, Table 1, Page 220	Methods, Table1, Page 4	Methods, Model outcomes and analysis Page 707		2.3.5 QALYs, Page 4	Treatment Effect and Dosing Page 1291	Model outcomes and clinical effectiveness, Page 2	Methods, Overview, Page 479	Model Parameters and Data Sources, Page 711	Method, Clinical data input, Page 604	Methods, Model description, Page 3			Methods, page 309	Materials and methods, Page 496	Quality of life data, Page 18		Materials and methods, Page 59	Outcomes, Page 3		Methods, Page 102
	13	Valuation of outcomes	Yes	Yes	No	No	No	Yes	Yes	No	Not applicable	Yes	Yes	Yes	No	No	No	No	No	Yes	No	No	No	No	Yes	9	0.391304
		Describe the population and methods used to measure and value outcomes.	Methods, Pages 510 and 511	Methods, Health utilities, Page 314				Final report, Utility Inputs	2.3.5 QALYs, Page 4			Methods, Overview, Page 479	Model Parameters and Data Sources, Page 711	Method, Clinical data input, Page 604						Quality of life data, Page 18					Methods, Page 102
	14	Measurement and valuation of resources and costs	Yes	Partially	Yes	Yes	No	No	Yes	Yes	Yes	Yes	Yes	Yes	Yes	No	Yes	Yes	No	Yes	Yes	Yes	Yes	No	Yes	17	0.73913
		Describe how costs were valued.	Methods, Page 511	Methods, Page 314 and 315 The approach to informal cost valuation is unclear.	Methods, Page 220	Methods, Measurement of costs, Page 3	Methods, Costs and utilities, Page 707 The approach to informal cost valuation and measuring nonmedical costs is unclear.		Methods, Costs, Page 4	Methods, Costs, Page 4 and Table 2	Resource use and unit costs, Page 2	Methods, Overview, Page 479		Cost data, Page 604	Cost and utility values, Page 4		Model inputs, Page e971	Costs, Page 310		Cost data, Page 18	Table 2, page 535	Materials and methods, Page 59	Costs, Page 3	Very limited information regarding cost measurement and valuation	Methods, Page 102
	15	Currency, date and Conversion	Yes	No	Yes	Yes	Yes	No	Yes	Yes	Yes	Yes	Yes	No	No	Yes	No	Yes	No	Yes	No	Yes	Yes	No	Yes	15	0.652174
		Report the dates of the estimated resource quantities and unit costs, plus the currency and year of conversion.	Methods, Page 511		Methods, Page 220		Methods, Costs and utilities, Page 707		Methods, Basic model design, Page 2	Methods, Costs, Page 4	Resource use and unit costs, Page 2	Methods, Overview, Page 479	Methods, Cost parameters, Page 712			Costs, Page 5		Page 310		Cost data, Page 18		Materials and methods, Page 59	Costs and QALYs, Page 6		Methods, Page 102
	16	Rationale and description of model	Yes	Yes	Yes	Yes	Yes	Partially	Yes	Yes	Yes	Yes	Partially	Yes	Yes	Yes	Yes	Yes	No	Partially	No	Partially	Partially	No	No	14	0.608696
		If modelling is used, describe in detail and why used. Report if the model is publicly available and where it can be accessed.	Methods, Pages 510, 511, 512	Methods, Model Structure, Pages 310 and 311	Methods, Page 219	Methods, Page 3	Methods, Page 706	Insufficient rationale and description of model structure.	Methods, Basic model design, Page 2	Methods, model overview, Page 2	Model description, Page 3	Model description and Structure, Pages 479 and 480	Insufficient rationale and description of model structure.	Model design, Pages 602 and 603	Model description, Pages 3 and 4	Markov model, Page 3		Original model, 308		Insufficient rationale and description of model structure.		Insufficient rationale and description of model structure.	Insufficient rationale and description of model structure.
	17	Analytics and assumptions	Partially	Partially	No	Yes	No	Partially	Yes	No	Partially	Yes	Partially	Yes	No	No	No	No	No	No	No	No	Yes	No	No	5	0.217391
		Describe any methods for analysing or statistically transforming data, any extrapolation methods, and approaches for validating any model used.	Methods, Page 510	Methods, Analyses, Page 316		Methods, Page 4			Supplimentary file		Limited information regarding the outcome input was provided in supplimentary material.	Results, Model validation, Page 483	Approaches for model validation partially explained in the supplimentary file.	Results, Pages 605 and 606									table 1, p. 4
	18	Characterising heterogeneity	No	Yes	No	Yes	Yes	Partially	Yes	Yes	No	No	No	Yes	No	No	No	No	Yes	No	No	No	No	No	No	7	0.304348
		Describe any methods used for estimating how the results of the study vary for subgroups.		Discussion, Page 316			Methods, Model outcomes and analysis Page 708	Final report, Subgroup Analyses and Heterogeneity	Sensitivity analysis, Page 6	Table 4 Scenario analyses results				Sensitivity analyses and scenario analysis, Page 605					Heterogeneities of CEA in Different Subgroups, Page 498
	19	Characterising distributional effects	No	No	No	No	No	No	No	No	No	No	No	No	No	No	No	No	No	No	No	No	No	No	No	0	0
		Describe how impacts are distributed across different individuals or adjustments made to reflect priority populations.
	20	Characterising uncertainty	Yes	Yes	Yes	Yes	Yes	Yes	Yes	Yes	Yes	Yes	Yes	Yes	No	Yes	Yes	Yes	Yes	Yes	Yes	Yes	Yes	Partially	Partially	20	0.869565
		Describe methods to characterise any sources of uncertainty in the analysis.	Methods, Pages 513 and 514		Methods, Page 221	Methods, Page 5	Methods, Page 708	Final report, Uncertainty and Controversies	Sensitivity analysis, Page 5		Sensitivity analysis, Page 5	Sensitivity analysis, Page 482		Sensitivity analyses and scenario analysis, Page 605		Sensitivity analyses, Page 6	Scenario and Sensitivity Analyses, Page e971	Results, Page 311	Heterogeneities of CEA in Different Subgroups, Page 497	Results, Page 18	Sensitivity Analysis, Page 534	Materials and methods, Page 59			Sensitivity Analyses, Page 103
	21	Approach to engagement with patients and others affected …	No	No	No	No	No	Partially	No	No	No	No	No	No	No	No	No	No	No	No	No	No	No	No	No	0	0
		Describe any approaches to engage patients or service recipients, the general public, communities, or stakeholders (such as clinicians or payers) in the design of the study.						Final report, A4. Potential Cost-Saving Measures in AD
results	22	Study parameters	Yes	Yes	Yes	Partially	Partially	Yes	Yes	Yes	Yes	Yes	Yes	Yes	Yes	Yes	Yes	Partially	Partially	Partially	Partially	Partially	Partially	Partially	No	13	0.565217
		Report all analytic inputs (such as values, ranges, references) including uncertainty or distributional assumptions.	Methods, Table 1 Page 512	Methods, Table 1, Page 312	Methods, Table 1 and 2, Pages 220 and 221	Methods, Parameters, Page 4 It did not state any of the transition probabilities used in the model.	Transition probabilities were reported only in the supplimentary documents.	Final report, Table 4.2. Key Model Inputs and E2. Model Inputs and Assumptions,		Table 1, Base-case patient characteristics and model clinical inputs	Model inputs, Page 4	Input Parameters, Page 479	Input Parameters, Page 713	Clinical data input: transition probabilities, Pages 603 and 604	Table 1 Summary table of model parameters included	Table 1, Model parameters and values applied in the analyses	Model inputs, Page e971				Information regarding the model components and outcome parameters was not provided.	Information regarding the model components and outcome parameters was not fully provided.	Information regarding the model components and outcome parameters was not fully provided.	Very limited information regarding study parameters
	23	Summary of main results	Yes	Yes	Yes	Yes	Yes	Yes	Yes	Yes	Yes	Yes	Yes	Yes	Yes	Yes	Yes	Yes	Yes	No	Yes	No	Yes	No	Yes	20	0.869565
		Report the mean values for the main categories of costs and outcomes of interest and summarise them in the most appropriate overall measure.	Results, Table 2, Page 514	Discussion, Table 2, Page 316	Methods, Table 3, Page 221	Discussion, Table 4, Page 7	Results, Page 708 and 709	Final report, 4.3. Results, Page 27	Results, Page 5	Table 3, Base-case results	Results, Page 5	Results, Page 483	Results, Page 715		Results	Results, Page 6		Table 2, Five-year (per patient) base-case results	Discussion, Pages 498 and 499				Tabel 2 and figure 1		Table 2. Net Benefit and Return on Investment of the PHC IGSI.
	24	Effect of uncertainty	Partially	Partially	Partially	Partially	Partially	Yes	Partially	Yes	Partially	Partially	Partially	Partially	Partially	Partially	Partially	Partially	Partially	Partially	Partially	Partially	Partially	Partially	Partially	2	0.0869565
		Describe how uncertainty about analytic judgments, inputs, or projections affect findings. Report the effect of choice of discount rate and time horizon, if applicable.	Results, Sensitivity analysis, Page 513	Results, Sensitivity analysis, Page 316	Results, Sensitivity analysis, Page 221	Discussion, Page 7	Discussion, Page 709	Final report, E4. Sensitivity Analyses, Page 123	Sensitivity analysis, Page 5	Sensitivity analysis, Page 1297-1302	Sensitivity analysis, Page 5	Sensitivity analysis, Page 483	Sensitivity analysis, 715	Sensitivity analyses and scenario analysis		Sensitivity analysis	Sensitivity analysis, Page e974		Discussion, Pages 498 and 499	Results, Page 18	Table 7. Sensitivity analysis of benefits of the Memory and Aging Program based upon NNT related to memory strategy use, Page 536		2.6 Sensitivity analyses, Page 5
	25	Effect of engagement with patients and others affected by the study	No	No	No	No	No	Partially	No	No	No	No	No	No	No	No	No	No	No	No	No	No	No	No	No	0	0
		Report on any difference patient/service recipient, general public, community, or stakeholder involvement made to the approach or findings of the study						Final report, A4. Potential Cost-Saving Measures in AD
Discussion	26	Study findings, limitations, generalisability, and current knowledge	Yes	Yes	Yes	Yes	Partially	Yes	Yes	Yes	Yes	Yes	Yes	Yes	Yes	Yes	Yes	Partially	Partially	Partially	Partially	Partially	Yes	Partially	Yes	16	0.695652
		Report key findings, limitations, ethical or equity considerations not captured, and how these could affect patients, policy, or practice.	Discussion, Pages 514, 515 and 516	Discussion, Pages 319, 320, 321	Discussion, Page 222	Discussion and limitation, Page 7 and 8	Discusstion, Strength and limitations, Page 711 The impact of assumptions and methodological choices was not fully described.	Limitations of the economic evaluation, Page 1616	Limitations and conclusions	Discussion, Page 1297	Discussion, Page 7	Discussion, Page 484	Discussion, Page 716	Discussion, Page 606		Discussion, Page 6	Discussion, Page e975		The paper cannot be relied upon to inform decision-making or be used to guide future research in this area.	Conclusion and future work, Page 21		Limitations of the research were not adderessed.	4 Discussion, Page 7	Discussion, Page 215	Discussion, Page 105
Other relevant information	27	Source of funding	Yes	Yes	Yes	Yes	Yes	Yes	Yes	Yes	Yes	Yes	No	Yes	Yes	Yes	Yes	Yes	Yes	No	No	No	Yes	Yes	No	18	0.782609
		Describe how the study was funded and any role of the funder in the identification, design, conduct, and reporting of the analysis	Study funding, Page 516	Source of funding, Page 321	Acknowledgements, Page 223	Funding, Page 9	Acknowledgements, Page 711	Disclosures, 1616	Conflict of interest, Page 9	Acknowlegement, Funding, Page 1304	Funding, Page 9	Funding/Support, Page 486		Acknowledgement, Page 608	Funding, Page 11	Funding, Page 8	Study Funding, Page e976	Acknowledgement, Page 314	Funding, Page 501				Acknowledgement, Page 9	Funding Sources, 217
	28	Conflicts of interest	Yes	Yes	Yes	Yes	Yes	Yes	Yes	Yes	Yes	Yes	Yes	Yes	Yes	Yes	Yes	Yes	Yes	No	Yes	No	Yes	Yes	No	20	0.869565
		Report authors conflicts of interest according to journal or International Committee of Medical Journal Editors requirements.	Conflict of interest, Page 516	Conflict of interest, Page 321	Disclosure, Page 223	Competing interests, Page 9	Conflict of interest, Page 711	Disclosures, 1616	Conflict of interest, Page 9	Disclosures, Page 1304	Conflict of interest, Page 9	Conflict of Interest Disclosures, Page 486	Acknowledgments, Page 717	Acknowledgement, Page 608	Acknowledgement, Page 11	Acknowledgements, Page 8	Acknowledgment, Page e976	Conflict of interest, Page 314	Acknowledgement, Page 501		Acknowledgements, Page 537		Conflict of interest, Page 9	Conflict of interest, Page 217
																										index	1
																										index	0
